# Supplementary material for: Inter-comparison of the Elemental and Organic Carbon Mass Measurements from Three North American National Long-term Monitoring Networks
Source: Copernicus journal article supplement (doi:10.5194/amt-2019-104), 2019-04-18
Supplement: Supplementary file 1 [file amt-2019-104-supplement.pdf]

1 Supplementary Information for:  
2 Inter-comparison of the Elemental and Organic  
3 Carbon Mass Measurements from Three North  
4 American National Long-term Monitoring Networks

5 Tak W. Chan<sup>1,\*</sup>, Lin Huang<sup>1,\*</sup>, Kulbir Banwait<sup>2</sup>, Wendy Zhang<sup>1</sup>, Darrell Ernst<sup>1</sup>, Xiaoliang Wang<sup>3</sup>, John G.  
6 Watson<sup>3</sup>, Judith C. Chow<sup>3</sup>, Mark Green<sup>3</sup>, Claudia Czimczik<sup>4</sup>, Guaciara M. Santos<sup>4</sup>, Sangeeta Sharma<sup>1</sup>, Keith  
7 Jones<sup>5</sup>

8 <sup>1</sup> Climate Chemistry Measurements and Research, Climate Research Division, Environment and Climate  
9 Change Canada, 4905 Dufferin Street, Toronto, Ontario, Canada, M3H 5T4

10 <sup>2</sup> Measurements and Analysis Research Section, Air Quality Research Division, Environment and Climate  
11 Change Canada, 4905 Dufferin Street, Toronto, Ontario, Canada, M3H 5T4

12 <sup>3</sup> Division of Atmospheric Sciences, Environmental Analysis Facility, Desert Research Institute, 2215  
13 Raggio Parkway, Reno, NV 89512

14 <sup>4</sup> University of California, Irvine, 3228 Croul Hall, Irvine, CA 92697-3100

15 <sup>5</sup> Applied Environmental Prediction Science Pacific & Yukon, Prediction Services Operations West,  
16 Prediction Services Directorate, Meteorological Service of Canada, #201-401 Burrard Street, Vancouver,  
17 B.C., Canada, V6C 3S5

18 \* Corresponding authors, Email: tak.chan@canada.ca, Phone: (416) 739-4419; lin.huang@canada.ca,  
19 Phone: (416) 739-5821

20

21

**10 pages, 1 table, and 6 figures**

22

23

24 **Supplementary Material:**

25 **Nomenclature**

|    |               |                                                                       |
|----|---------------|-----------------------------------------------------------------------|
| 26 | AIHL          | Air-industrial hygiene laboratory                                     |
| 27 | AMS           | Accelerator mass spectrometry                                         |
| 28 | BC            | Black carbon                                                          |
| 29 | CABM          | Canadian Aerosol Baseline Measurement                                 |
| 30 | CAPMoN        | Canadian Air and Precipitation Monitoring Network                     |
| 31 | CARE          | Center for Atmospheric Research Experiment                            |
| 32 | CCMR          | Climate Chemistry Measurements and Research                           |
| 33 | DRI           | Desert Research Institute                                             |
| 34 | DRI-TOR       | CAPMoN measurements using IMPROVE on DRI analyzer with TOR correction |
| 35 | EC            | Elemental carbon                                                      |
| 36 | ECCC          | Environment and Climate Change Canada                                 |
| 37 | ECT9          | EnCan-Total-900 protocol                                              |
| 38 | FID           | Flame ionization detector                                             |
| 39 | FLEXPART      | FLEXible PARTicle dispersion model                                    |
| 40 | ICP           | Inter-comparison study                                                |
| 41 | IMPROVE       | Interagency Monitoring PROtected Visual Environments                  |
| 42 | IMPROVE_A TOR | IMPROVE_A TOR protocol on DRI analyzer                                |
| 43 | KCCAMS        | Keck Carbon Cycle accelerator mass spectrometry                       |
| 44 | MAC           | Mass absorption coefficient                                           |
| 45 | NIST          | National Institute of Standard and Technology                         |
| 46 | OC            | Organic carbon                                                        |
| 47 | PM            | Particulate matter                                                    |
| 48 | POC           | Pyrolyzed organic carbon                                              |
| 49 | PSAP          | Particle Soot Absorption Photometer                                   |
| 50 | SOA           | Secondary organic aerosol                                             |
| 51 | SRM           | Standard Reference Material                                           |
| 52 | Sunset-TOT    | IMPROVE TOT protocol on Sunset analyzer                               |
| 53 | TC            | Total carbon                                                          |
| 54 | TEA           | Thermal evolution analysis                                            |
| 55 | TOA           | Thermal optical analysis                                              |
| 56 | TOR           | Thermal optical reflectance                                           |
| 57 | TOT           | Thermal optical transmittance                                         |
| 58 | UCI           | University of California Irvine                                       |

59

60

61 **Thermal-Optical Analysis / Thermal Evolution Analysis**

62 During the analysis of both thermal-optical analysis (TOA) and thermal evolution analysis (TEA), a small  
63 punch of the filter is placed either inside the Desert Research Institute (DRI) carbon analyzer  
64 (<https://www.dri.edu/>) or the Sunset laboratory-based carbon analyzer (<http://www.sunlab.com>) and  
65 subjected to a step-wise heating protocol.

66 IMPROVE\_A is a TOA protocol. The heating is in successive steps of 140°C (OC1), 280°C (OC2), 480°C  
67 (OC3), and 580°C (OC4) in helium (He) flow and 580°C (EC1), 740°C (EC2), and 840°C (EC3) in 2% O<sub>2</sub> and  
68 98% He environment (Figure S1a; Table S1) (Chow et al, 2007). The evolved carbon is first oxidized to  
69 CO<sub>2</sub> then reduced to CH<sub>4</sub> and be determined by a flame ionization detector (FID) via using an internal  
70 standard of CH<sub>4</sub>. During the heating under a non-oxidative atmosphere, much of the OC will be  
71 combusted and leave the filter, some OC including the oxygenated compounds, char and turn to  
72 pyrolyzed organic carbon (POC) which would be combusted under an oxidative environment with EC.  
73 The POC mass defined in the IMPROVE\_A method is estimated by monitoring the reflectance (i.e.,  
74 thermal optical reflectance; TOR) of a 633-650 nm laser beam within the oxidative environment. The  
75 combustion of POC result in an increased laser reflectance signal. When the reflectance signal returns  
76 to its initial intensity at the start of the analysis (i.e., prior to the formation of POC), it is assumed all POC  
77 is combusted and the remaining carbon mass in the analysis belongs to EC. The IMPROVE\_A protocol  
78 defines OC as OC1+OC2+OC3+OC4+POC while EC is defined as EC1+EC2+EC3-POC.

79 The IMPROVE protocol is similar to the IMPROVE\_A protocol, and the heating steps in this TOA protocol  
80 includes 120°C (OC1), 250°C (OC2), 450°C (OC3), and 550°C (OC4) in He flow and 550°C (EC1), 700°C  
81 (EC2), and 800°C (EC3) in 2% O<sub>2</sub>/98% He atmosphere (Figure S1b; Table S1) (Chow et al., 1993). OC is  
82 defined as OC1+OC2+OC3+OC4+POC while EC is defined as EC1+EC2+EC3-POC.

83 The EnCan-Total-900 (ECT9) is a TEA protocol that utilizes higher temperature set point and longer  
84 retention time (compared to IMPROVE and IMPROVE\_A) for baseline separation of OC, POC, and EC  
85 (Huang et al., 2006; Chan et al., 2010). The ECT9 method consists of three temperature settings. First,  
86 two 600 s heating stages at 550°C and 870°C under pure He stream for OC and POC including carbonate  
87 carbon (CC) determination, respectively; then followed by EC determination over a 420 s heating at  
88 900°C under 2% O<sub>2</sub> and 98% He atmosphere (Figure S1c; Table S1). Different from the IMPROVE and  
89 IMPROVE\_A protocols, POC defined in ECT9 method is not a charring correction but represent different  
90 groups of organic compounds, as well as some calcium carbonate (CaCO<sub>3</sub>) that does not combust under  
91 550°C. The total OC in ECT9 method is defined as OC+POC.

92

93

94

95 **Figure S1** Comparison of the (a) IMPROVE\_A, (b) IMPROVE, and (c) EnCan-Total-900 (ECT9) protocols  
 96 used in the different networks. Note that the time scale (i.e., x-axis scale) for IMPROVE and IMPROVE\_A  
 97 are for illustration purposes as IMPROVE and IMPROVE\_A protocols are event driving depending on the  
 98 particle loading on the filter punch.

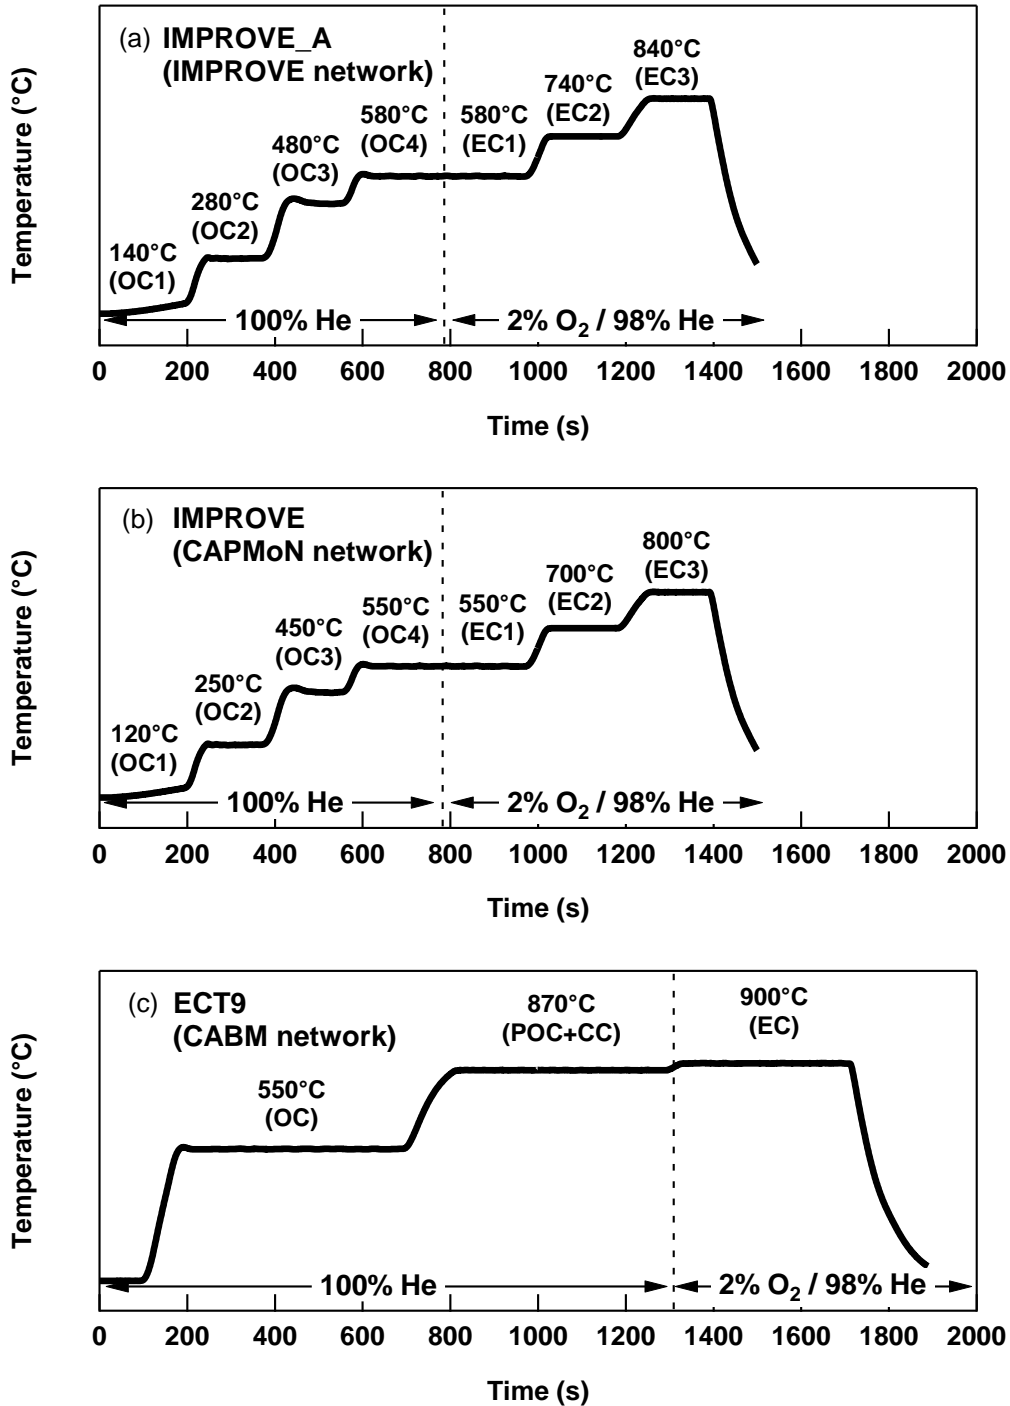

99

100

101 **Table S1** Experimental parameters of the three TOA/TEA protocols used in this study.

| Methods<br>Carrier gas | Carbon<br>fraction | IMPROVE_A<br>Temp (°C), Time (s) | IMPROVE<br>Temp (°C), Time (s) | ECT9<br>Temp (°C), Time (s) |
|------------------------|--------------------|----------------------------------|--------------------------------|-----------------------------|
| He-purge               |                    | 30, 90                           | 30, 90                         | -                           |
| He                     | OC1                | 140, 150-580                     | 120, 150-600                   | -                           |
| He                     | OC2                | 280, 150-580                     | 250, 150-600                   | -                           |
| He                     | OC3                | 480, 150-580                     | 450, 150-600                   | -                           |
| He                     | OC4                | 580, 150-580                     | 550, 150-600                   | -                           |
| He                     | OC                 | -                                | -                              | 550, 600                    |
| He                     | POC                | -                                | -                              | 870, 600                    |
| O <sub>2</sub> /He     | EC1                | 580, 150-580                     | 550, 150-600                   | -                           |
| O <sub>2</sub> /He     | EC2                | 740, 150-580                     | 700, 150-600                   | -                           |
| O <sub>2</sub> /He     | EC3                | 840, 150-580                     | 800, 150-600                   | -                           |
| O <sub>2</sub> /He     | EC                 | -                                | -                              | 900, 420                    |

102 Note: OC in IMPROVE\_A and IMPROVE are defined as OC1+OC2+OC3+OC4+POC  
 103 EC in IMPROVE\_A and IMPROVE are defined as EC1+EC2+EC3-POC  
 104 For ECT9, total OC is defined as OC+POC. For consistency purpose, the “ECT9 OC” discussed in  
 105 this work refers to OC+POC.

106  
107  
108  
109 **Radiocarbon analysis**

110 The <sup>14</sup>C/<sup>12</sup>C abundances associated to the individual mass fractions of TC, OC and EC were determined  
 111 using accelerator mass spectrometry (AMS) at the Keck Carbon Cycle AMS (KCCAMS) Facility at  
 112 University of California Irvine (UCI). The KCCAMS/UCI runs an inhouse modified AMS compact  
 113 instrument (0.5MV 1.5SDH-2) purchased from National Electrostatic Corporation (Beverly et al., 2010).  
 114 Optimizations to the spectrometer couple with ultra-small sample capabilities (Santos et al., 2007)  
 115 allowed for the measurement of single OC and/or EC fractions, besides TC samples. Mass fractions of  
 116 TC, OC and EC isolated by the ECT9 protocol using a Sunset Laboratory instrument (Huang et al., 2006)  
 117 was shipped to KCCAMS/UCI as cryogenically trapped CO<sub>2</sub> in sealed ampules followed by a separated set  
 118 of reference materials. Isolated CO<sub>2</sub> samples were then converted to filamentous graphite following  
 119 specific protocols (Santos and Xu, 2017) and analyzed for their carbon isotopes. Radiocarbon results as  
 120 FM (fraction modern carbon) were corrected for background effects and isotopic fractionation with δ<sup>13</sup>C  
 121 of prepared graphite measured directly at the spectrometer, as described by Santos et al. (2007).

122  
123  
124

125 **Figure S2** Box plots summarizing the magnitude of the gaseous adsorption, in (a) absolute value and (b)  
 126 percentage, on CAPMoN TC, OC, POC, and EC mass measurements. Measurements prior to 2008 were  
 127 obtained using the Sunset-TOT method while measurements from 2008-2015 were obtained using the  
 128 DRI-TOR method. Each individual box represents the 25th, 50th, and 75th percentiles of the  
 129 measurement values while the 10th and 90th percentiles are represented by the bottom and top  
 130 whiskers, respectively.

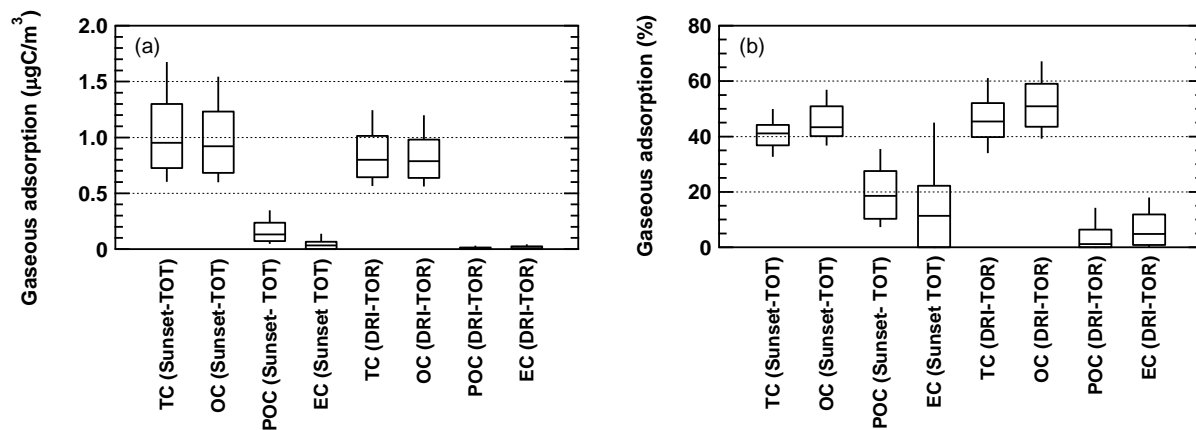

131

132

133

134 **Figure S3** ECT9 EC and IMPROVE\_A TOR EC concentrations time series.

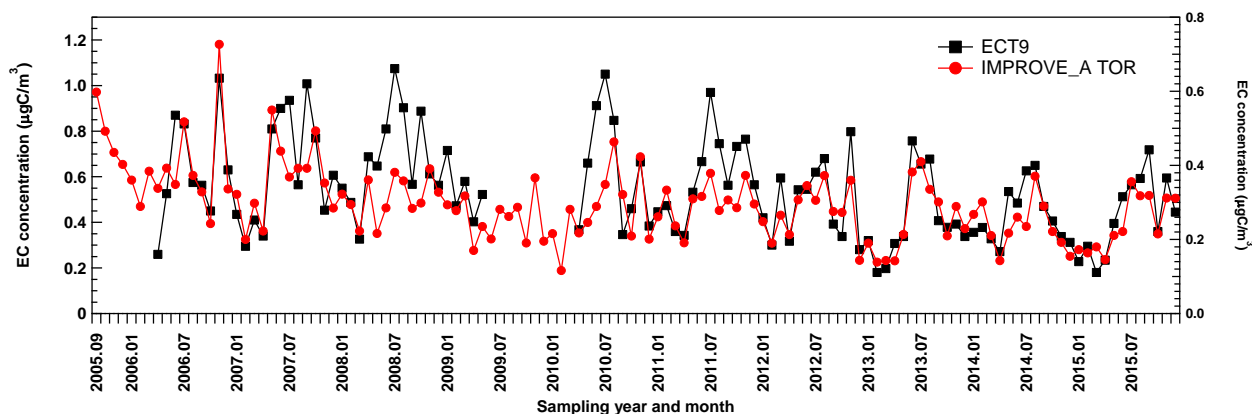

135

136

137 **Figure S4** Wind rose analysis (by month) based on the local wind speed and direction data for various  
 138 months obtained at Egbert over the period from 2006 to 2015.

**Egbert (2006-2015 Jan)**<sub>0</sub>

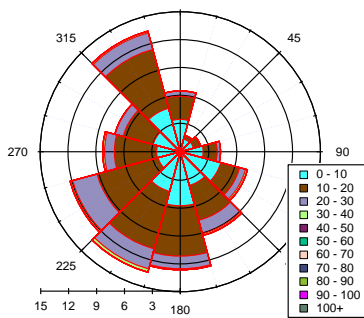

**Egbert (2006-2015 Feb)**<sub>0</sub>

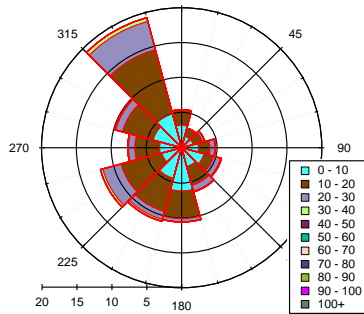

**Egbert (2006-2015 Mar)**<sub>0</sub>

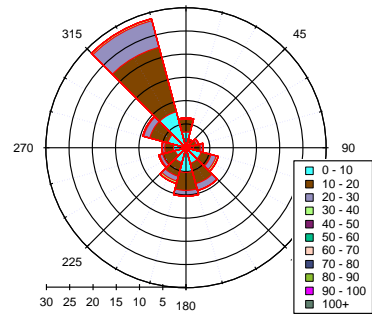

139

**Egbert (2006-2015 Apr)**<sub>0</sub>

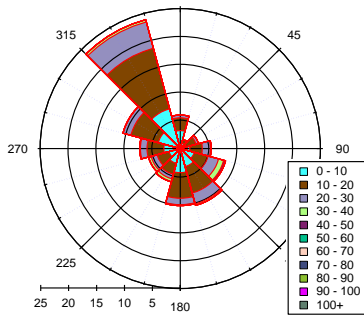

**Egbert (2006-2015 May)**<sub>0</sub>

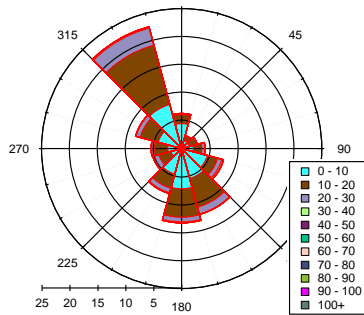

**Egbert (2006-2015 Jun)**<sub>0</sub>

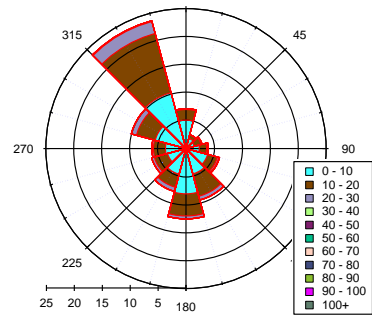

140

**Egbert (2006-2015 Jul)**<sub>0</sub>

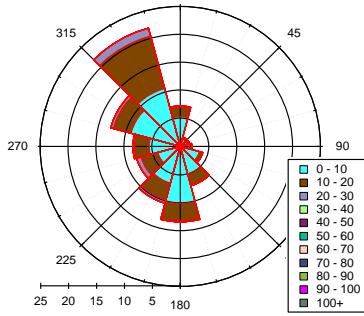

**Egbert (2006-2015 Aug)**<sub>0</sub>

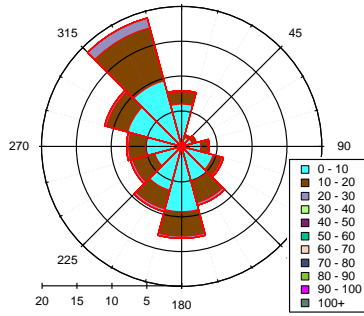

**Egbert (2006-2015 Sep)**<sub>0</sub>

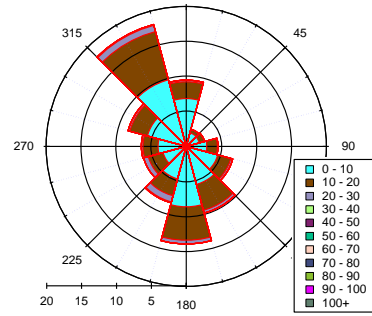

141

**Egbert (2006-2015 Oct)**<sub>0</sub>

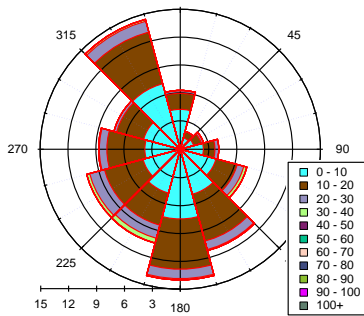

**Egbert (2006-2015 Nov)**<sub>0</sub>

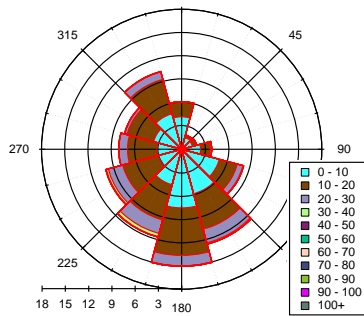

**Egbert (2006-2015 Dec)**<sub>0</sub>

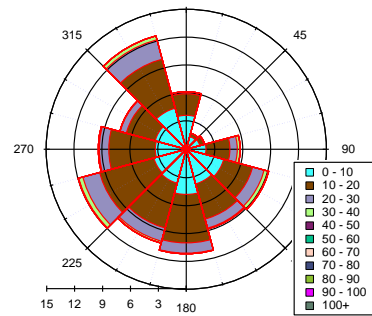

142

143

144 **Figure S5** Figure shows the relationship of (a) TC, (b) OC, and (c) EC as a function of ambient  
145 temperature. IMPROVE, CAPMoN, and CABM measurements are represented by the black, orange,  
146 and blue markers, respectively. The red trace represents the best-fitted Sigmoid function on all  
147 measurement while the red dashed lines cover the 95% confidence interval of the best-fit function.

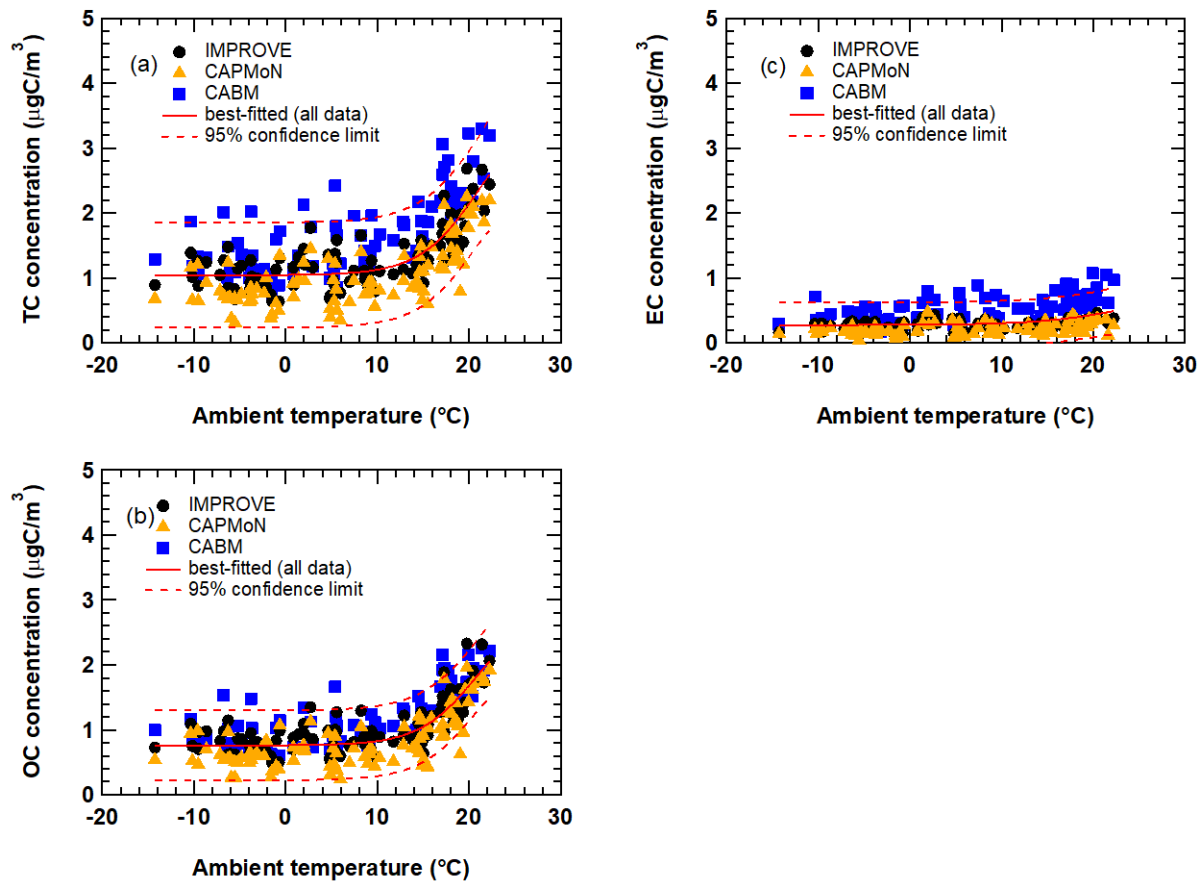

148

149

150



151 **Figure S6** Figure showing the average air masses footprint reaching Egbert derived from FLEXPART.  
152 Results are derived from daily footprint over the period from 2006 to 2015, from (a) May to October and  
153 (b) November to April. Red, green, and purple colors represent the relative probability of the air masses  
154 origin in decreasing likelihood. To improve the visibility, results are plotted on log scale.

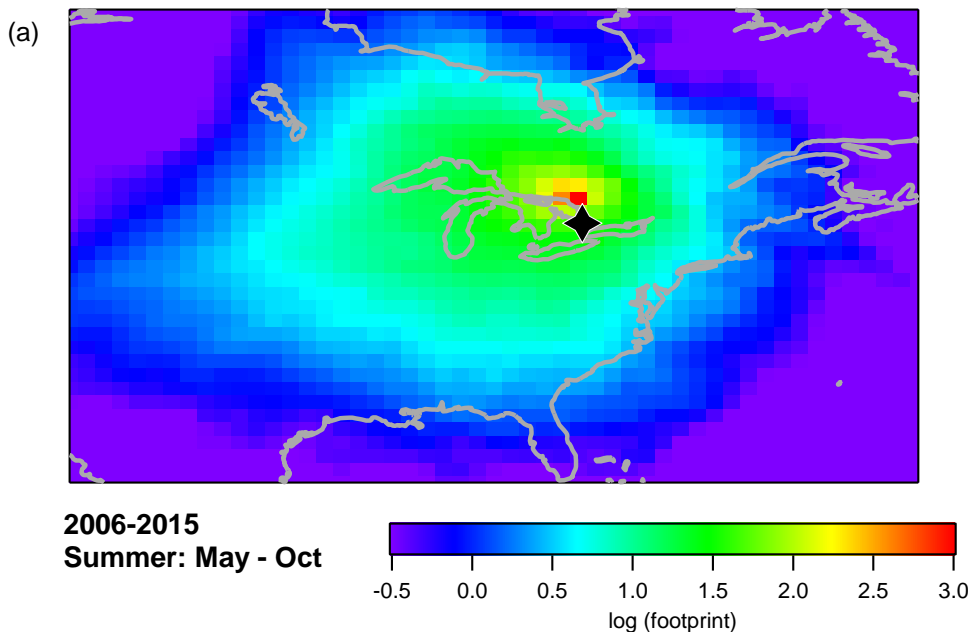

155

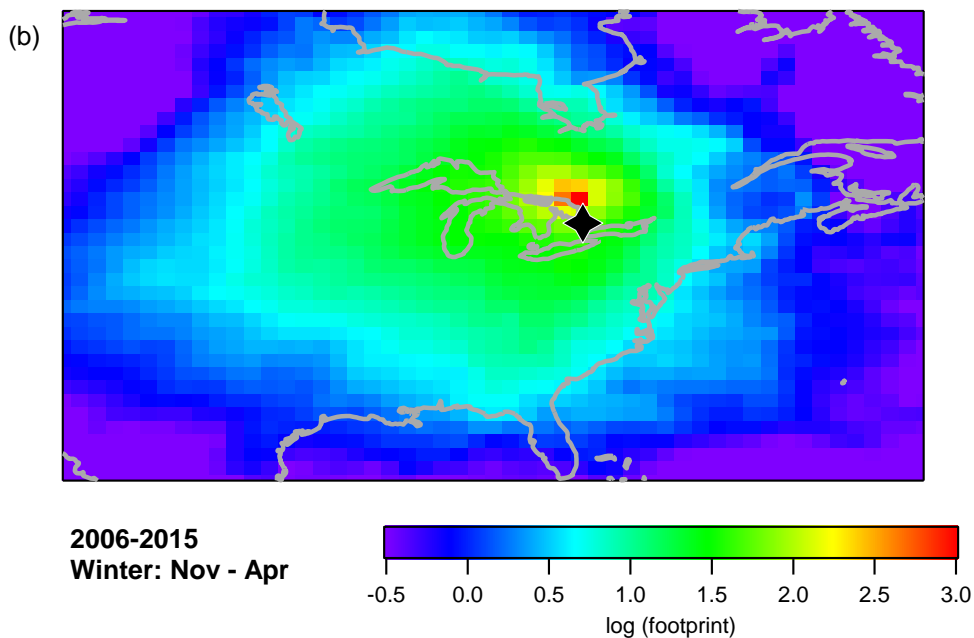

156

157

158 **References**

- 159 Beverly, R.K., Beaumont, W., Tautz, D., Ormsby, K.M., von Reden, K.F., Santos, G.M. and Southon, J.R.:  
160 The Keck Carbon Cycle AMS Laboratory, University of California, Irvine: Status report, Radiocarbon 52(2),  
161 301-309, 2010.
- 162 Chan, T. W., Huang, L., Leitch, W. R., Sharma, S., Brook, J. R., Slowik, J. G., Abbatt, J. P. D., Brickell, P. C.,  
163 Liggio, J., Li, S. M., and Moosmüller, H.: Observations of OM/OC and specific attenuation coefficients  
164 (SAC) in ambient fine PM at a rural site in central Ontario, Canada, Atmos. Chem. Phys, 10, 2393-2411,  
165 2010.
- 166 Chow, J. C., Watson, J. G., Pritchett, L. C., Pierson, W. R., Frazier, C. A., and Purcell, R. G.: The DRI  
167 Thermal/Optical Reflectance carbon analysis system: Description, evaluation and applications in U.S. air  
168 quality studies, Atmos. Environ., 27A, 1185-1201, 1993.
- 169 Chow, J. C., Watson, J. G., Chen, L.-W. A., Chang, M.-C. O., Robinson, N. F., Trimble, D. L., and Kohl, S. D.:  
170 The IMPROVE\_A temperature protocol for thermal/optical carbon analysis: Maintaining consistency  
171 with a long-term database, J. Air Waste Manage. Assoc., 57, 1014-1023, 2007.
- 172 Huang, L., Brook, J. R., Zhang, W., Li, S. M., Graham, L., Ernst, D., Chivulescu, A., and Lu, G.: Stable  
173 isotope measurements of carbon fractions (OC/EC) in airborne particulate: A new dimension for source  
174 characterization and apportionment, Atmos. Environ., 40, 2690-2705, 2006.
- 175 Santos, G.M., Moore, R., Southon, J., Griffin, S., Hinger, E., Zhang, D.: AMS 14C preparation at the  
176 KCCAMS/UCI Facility: status report and performance of small samples. Radiocarbon 49(2), 255-269,  
177 2007.
- 178 Santos, G.M. and Xu, X.: Bag of Tricks: A Set of Techniques and other Resources to Help 14 C Laboratory  
179 setup, Sample Processing, and Beyond, Radiocarbon, 59(3), 785-801, 2017.

180
